# Supplementary material for: Echinacoside promotes the proliferation of human renal tubular epithelial cells by blocking the HBX/TREM2-mediated NF-κB signalling pathway
Source: PubMed Central journal article supplement — Mol Med Rep. 2020 Jun 2;22(2):1137–44. doi: 10.3892/mmr.2020.11201 (PMC7339676; doi:10.3892/mmr.2020.11201), 2020-06-02
Supplement: Supplementary_Data.pdf [file Supplementary_Data.pdf]

Table SI. Human gene TREM2 siRNA information.

| siRNA      | Locus position | Sequence (5'→3')    |
|------------|----------------|---------------------|
| si-TREM2-1 | 385-403        | CCATTACGCTGCGGAATCT |
| si-TREM2-2 | 589-607        | GCCTCTTGGAAGGAGAAAT |
| si-TREM2-3 | 753-771        | CCAGGGTATCAGCTCCAAA |

TREM2, triggering receptor expressed on myeloid cells 2; siRNA, small interfering RNA.

Table SII. Primary antibodies used for western blotting.

| Protein          | Cat. no. | Supplier                        | Dilution |
|------------------|----------|---------------------------------|----------|
| HBX              | ab2741   | Abcam                           | 1:2,000  |
| TREM2            | ab201621 | Abcam                           | 1:1,000  |
| NF- $\kappa$ B   | ab86299  | Abcam                           | 1:2,000  |
| Cleaved caspase3 | ab90437  | Abcam                           | 1:1,000  |
| Survivin         | ab76424  | Abcam                           | 1:5,000  |
| GAPDH            | 5174     | Cell Signaling Technology, Inc. | 1:2,000  |
| H3               | ab61251  | Abcam                           | 1:1,000  |

HBX, hepatitis B virus X; TREM2, triggering receptor expressed on myeloid cells 2; H3, histone H3.
